# Supplementary material for: Chemically anchored liquid-PEO based block copolymer electrolytes for solid-state lithium-ion batteries
Source: Royal Society of Chemistry journal article supplement (doi:10.1039/c4ta02327g), 2014-01-01
Supplement: c4ta02327g1.pdf [file c4ta02327g1.pdf]

## Supporting Information

### Chemically anchored Liquid-PEO based Block Copolymer Electrolytes for Solid-State Lithium-Ion Batteries

*Julien Rolland, Jérémy Brassinne, Jean-Pierre Bourgeois, Elio Poggi, Alexandru Vlad, Jean-François Gohy\**

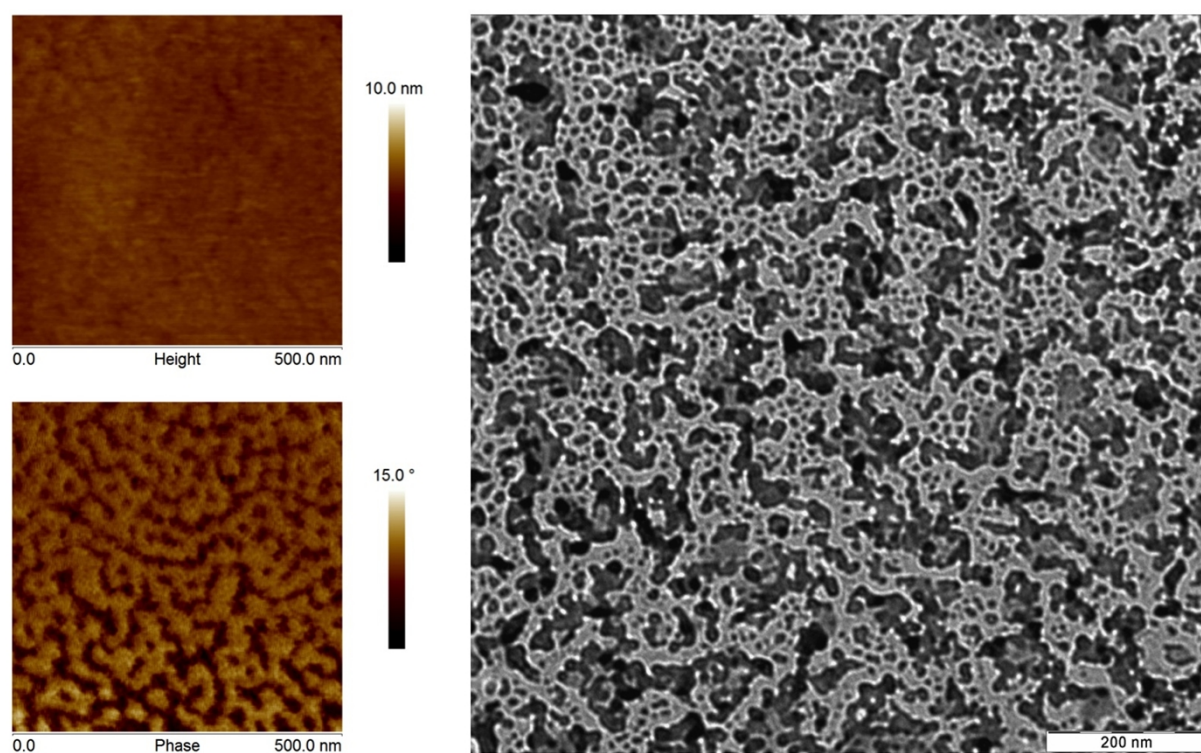

**Figure S1.** (left) Atomic force microscopy analysis of the PS-*b*-POEG<sub>9</sub>MA electrolyte (topography and phase contrast) revealing the microstructural segregation. (right) TEM inspection is consistent with AFM images.

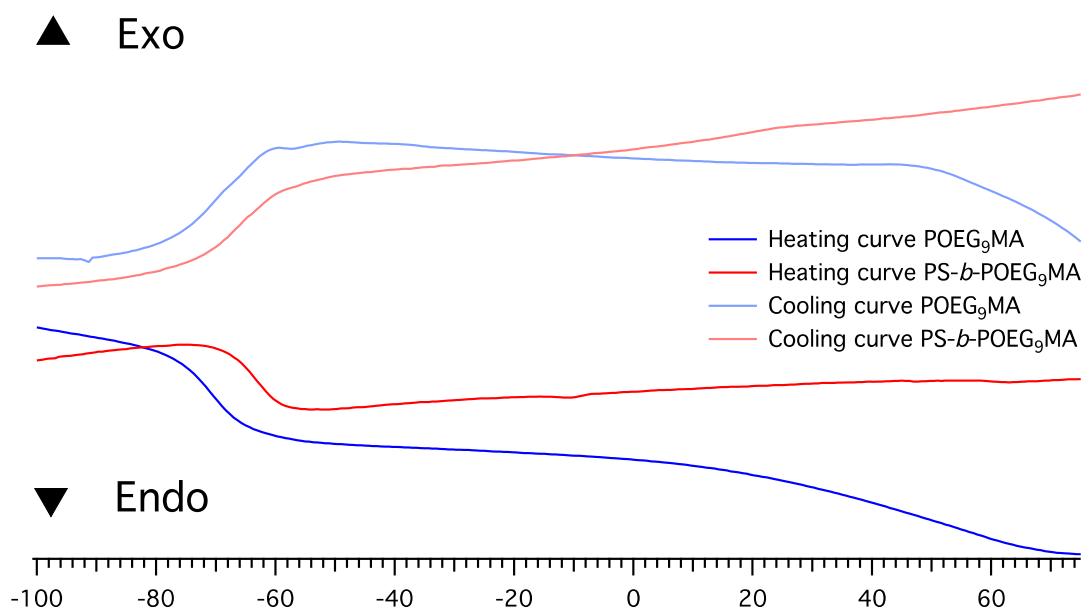

**Figure S2.** DSC cooling and heating diagrams for PS<sub>96</sub>-*b*-POEG<sub>9</sub>MA<sub>84</sub> and POEG<sub>9</sub>MA<sub>88</sub> at a rate of 5°C/min.

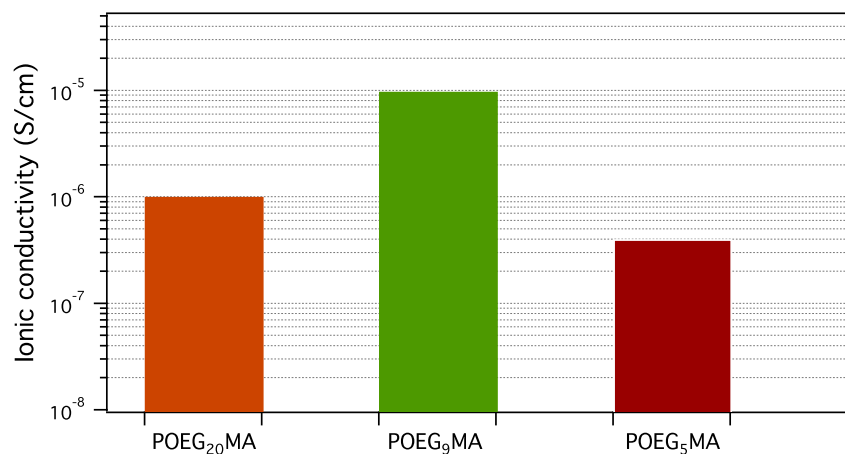

**Figure S3.** Ionic conductivity of POEG<sub>5,9,20</sub>MA homopolymers doped with 30:1 equivalents of LiClO<sub>4</sub>.

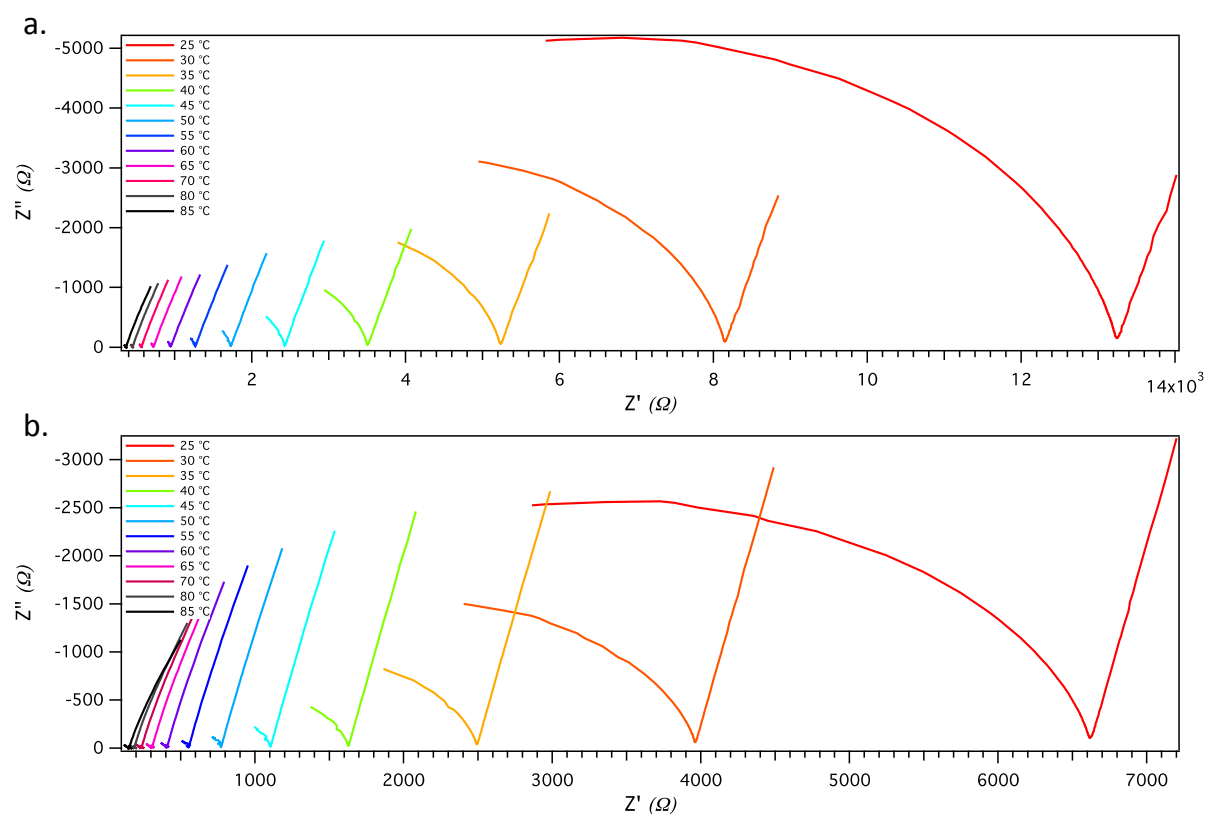

**Figure S4.** Nyquist plots of (a) PS-*b*-POEG<sub>9</sub>MA and (b) POEG<sub>9</sub>MA in a temperature range of 25 °C to 85°C.
